# Supplementary material
Source: PubMed Central journal article supplement (PMC2768015)
Supplement: tjp0587-4589-SD1.pdf [file tjp0587-4589-SD1.pdf]

## Supplemental Material

Double exponential fits were made to the NMDA receptor current decay following application of 1, 10, and 50  $\mu\text{M}$  memantine in the continuous presence of 10  $\mu\text{M}$  NMDA + 10  $\mu\text{M}$  glycine at -66 mV. For 1 and 10  $\mu\text{M}$  memantine, the data used for Fig. 2 were fit; for 50  $\mu\text{M}$  memantine, the data used for Fig. 4D (Trapping Protocol) were fit. For each current decay, 13 s of data were fit, starting at a time  $t_p$  (see Methods) after barrel movement. The results are shown in Supplemental Table 1. Interpretation of the fast component of block and its amplitude is difficult because: (1) The binding kinetics of channel blockers is complex, and in general more than 2 exponentials are expected even when there is only one blocker binding site; (2) Especially at higher memantine concentrations, a very fast component of block was largely complete before fitting was begun, and so neither the amplitude nor the time constant of the fastest component is reflected by the fitting results. Thus, only  $\tau_s$  in Supplemental Table 1 is likely to be a reliable reflection of the time course of block onset.

**Table S1. Time constants of current relaxations during onset of inhibition by memantine**

| [Mem] ( $\mu\text{M}$ ) | $\tau_f$ (s)    | $A_f$ | $\tau_s$ (s)    |
|-------------------------|-----------------|-------|-----------------|
| 1                       | $0.25 \pm 0.11$ | 0.31  | $6.06 \pm 1.11$ |
| 10                      | $0.25 \pm 0.10$ | 0.41  | $2.66 \pm 0.37$ |
| 50                      | $0.27 \pm 0.08$ | 0.48  | $1.41 \pm 0.08$ |

$\tau_f$  is the faster and  $\tau_s$  the slower time constant determined from double exponential fits to current relaxations.  $A_f$  is the fractional amplitude of the faster component. Number of cells for each measurement is 4.
